# Supplementary material for: Hybrid Material Based on an Amorphous-Carbon Matrix and ZnO/Zn for the Solar Photocatalytic Degradation of Basic Blue 41
Source: MDPI journal article supplement (doi:10.3390/molecules25010096), 2019-12-26
Supplement: s1 [file s1]

## **Supplementary Material**

### **Hybrid material based on an amorphous-carbon matrix and ZnO/Zn for the solar photocatalytic degradation of basic blue 41**

Silvania Lanfredi<sup>1,\*</sup>, Marcos A. L. Nobre<sup>2</sup>, Po S. Poon<sup>3</sup>, Juan Matos<sup>3,4,\*</sup>

<sup>1</sup>Department of Chemistry and Biochemistry, São Paulo State University (Unesp), School of Technology and Sciences, Laboratory of Composites and Ceramics Functional, Presidente Prudente, Brazil.

<sup>2</sup>Department of Physics, São Paulo State University (Unesp), School of Technology and Sciences, Presidente Prudente, Brazil.

<sup>3</sup>Technological Development Unit (UDT), University of Concepcion, Concepcion, Chile.

<sup>4</sup>Millennium Nuclei on Catalytic Processes towards Sustainable Chemistry (CSC), Chile.

\*Corresponding authors. Emails: [jmatoslale@gmail.com](mailto:jmatoslale@gmail.com) (J. Matos); [silvania.lanfredi@unesp.br](mailto:silvania.lanfredi@unesp.br) (S. Lanfredi)

**Table S1.** Summary of kinetics model for the analysis of the kinetic data of BB41 adsorption.

| Kinetic model           | Equation                                                                                                             | Reference |
|-------------------------|----------------------------------------------------------------------------------------------------------------------|-----------|
| Pseudo-first-order      | $\log(\text{BB41}_{\text{ads-eq}} - \text{BB41}_{\text{ads-t}}) = \log(\text{BB41}_{\text{ads-eq}}) - (k_1/2.303) t$ | 81        |
| Pseudo-second-order     | $(1/\text{BB41}_{\text{ads-eq}} - \text{BB41}_{\text{ads-t}}) = (1/\text{BB41}_{\text{ads-eq}}) + k_2 t$             | 82        |
| Intraparticle diffusion | $\text{BB41}_{\text{ads-t}} = C + k_p t^{1/2}$                                                                       | 83,84     |

The pseudo-first-order model showed in Eq. (1) where  $k_1$  is the pseudo-first-order rate constant ( $\text{min}^{-1}$ ) for the adsorption.  $\text{BB41}_{\text{ads-t}}$  is the amount of BB41 adsorbed (in  $\mu\text{mol}$ ) at time  $t$  (min) and  $\text{BB41}_{\text{ads-eq}}$  is the amount adsorbed at equilibrium (in  $\mu\text{mol}$ ).

$$d\text{BB41}_{\text{ads}}/dt = k_1(\text{BB41}_{\text{ads-eq}} - \text{BB41}_{\text{ads-t}}) \quad (1)$$

The integration of Eq. (1) at the initial conditions ( $n_{\text{ads}} = 0$  at  $t = 0$ ) yields the Eq. (2):

$$\log(\text{BB41}_{\text{ads-eq}} - \text{BB41}_{\text{ads-t}}) = \log(\text{BB41}_{\text{ads-eq}}) - (k_1/2.303) t \quad (2)$$

In addition, a pseudo-second-order equation may be expressed by Eq. (3):

$$d\text{BB41}_{\text{ads}}/dt = k_2(\text{BB41}_{\text{ads-eq}} - \text{BB41}_{\text{ads-t}})^2 \quad (3)$$

Where  $k_2$  is the pseudo-second-order rate constant ( $\mu\text{mol}^{-1} \cdot \text{min}^{-1}$ ) for the adsorption. Applying the initial conditions, Eq. (3) can be integrated to obtain:

$$(1/\text{BB41}_{\text{ads-eq}} - \text{BB41}_{\text{ads-t}}) = (1/\text{BB41}_{\text{ads-eq}}) + k_2 \cdot t \quad (4)$$

The influence of the intraparticle diffusion phenomena upon the adsorption capacity of BB41 was verified keeping in mind that the fractional approach to equilibrium change is done according to a function of  $(D_t/r^2)^{1/2}$ , where  $r$  is the radius of adsorbent particle, and  $D$  is the effective diffusivity of solute within the particle. Thus, the initial rate according to the intraparticle diffusion model (IPD) is obtained from the liner regression of the curve  $\text{BB41}_{\text{ads-t}} = f(t^{1/2})$ , expressed by the Eq. (5), where  $k_p$  is the IPD rate constant ( $\mu\text{mol min}^{-0.5}$ ), and  $C$  is a constant ( $\mu\text{mol}$ ) attributed to the extension of the boundary layer thickness.

$$\text{BB41}_{\text{ads-t}} = C + k_p t^{1/2} \quad (5)$$

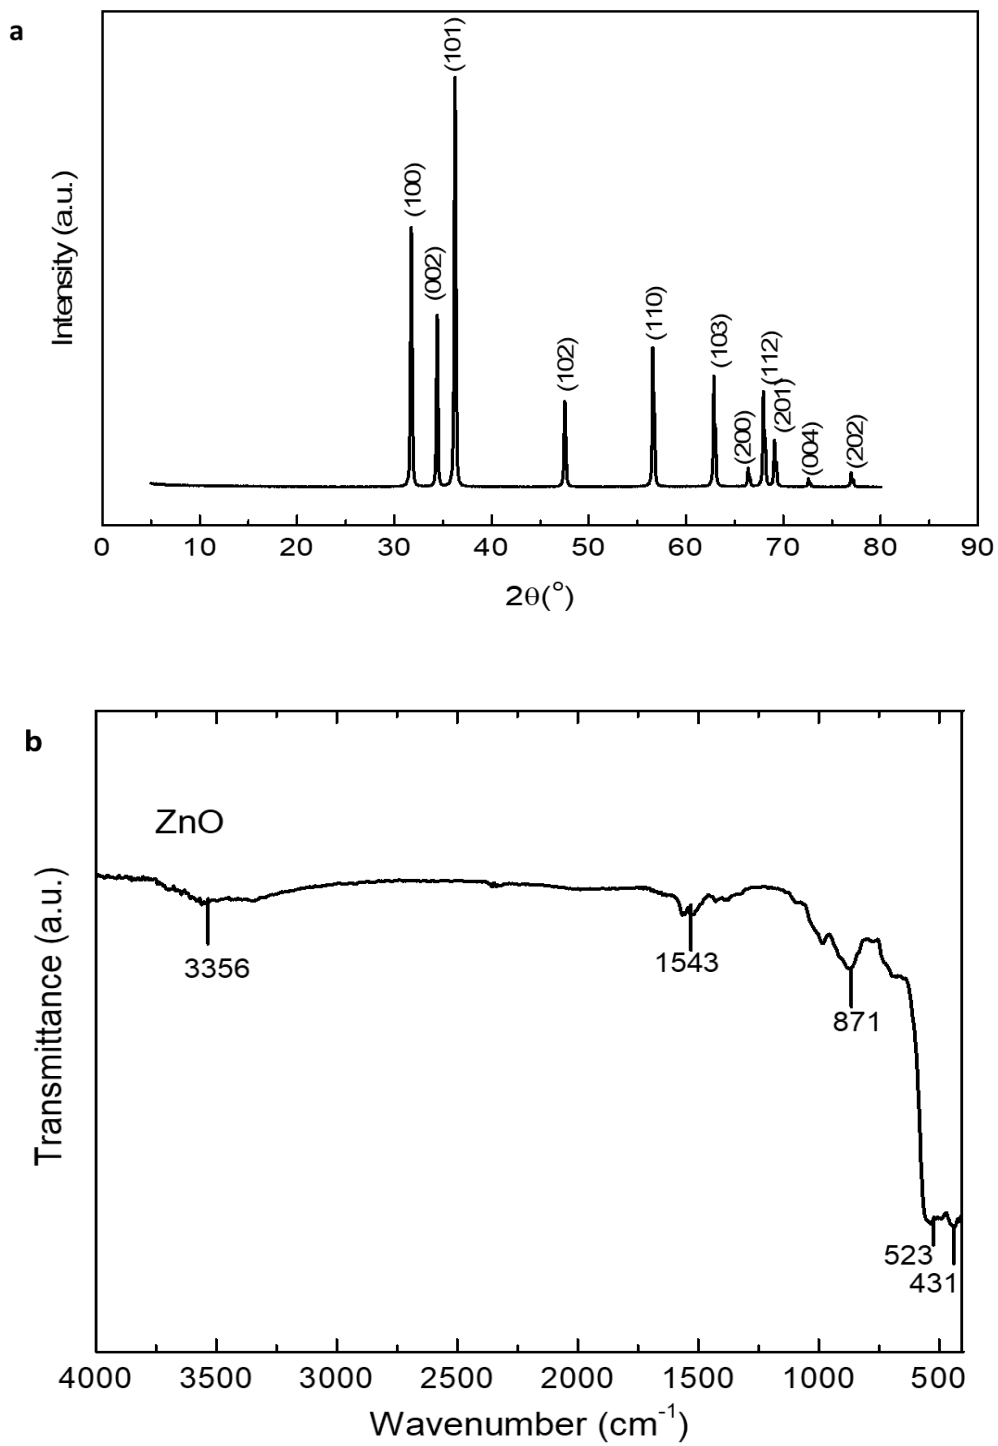

**Figure S1.** Characterization of commercial ZnO. (a): XRD pattern. (b): FTIR spectra.

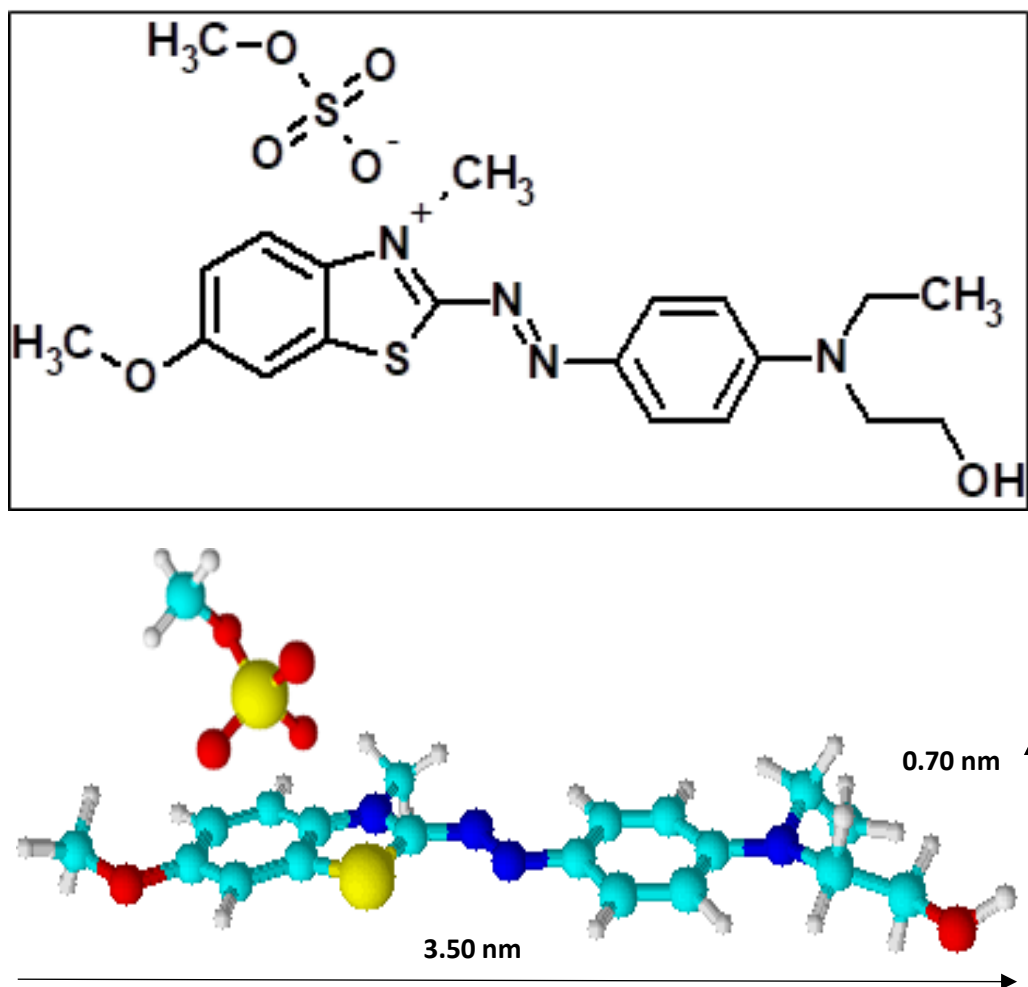

**Figure S2.** Molecular structure of basic blue 41.

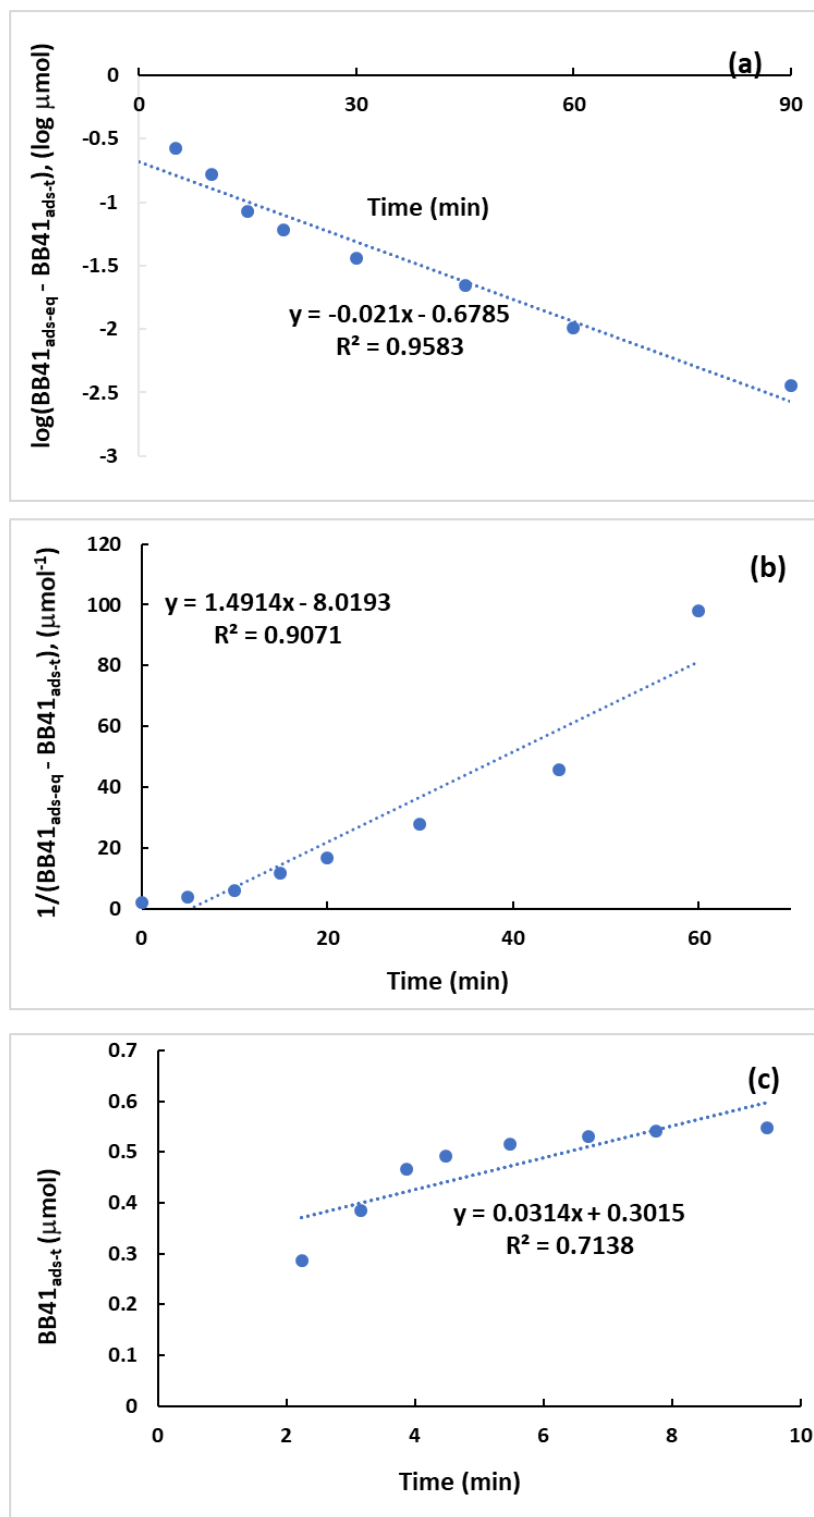

**Figure S3.** Kinetic treatment of the data of BB41 adsorption on C-amorphous. (a): Pseudo-first order. (b): Pseudo-second order. (c): IPD model.

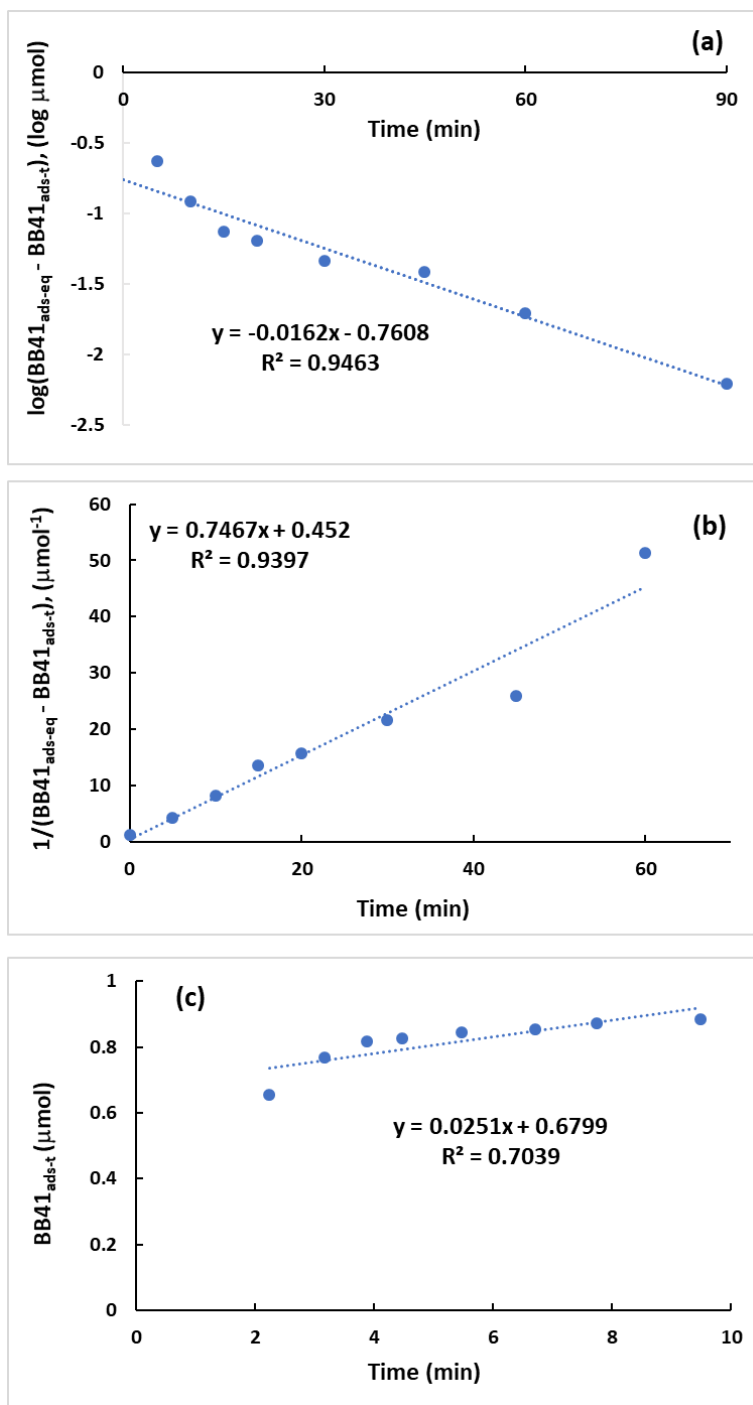

**Figure S4.** Kinetic treatment of the data of BB41 adsorption on C/Zn. (a): Pseudo-first order. (b): Pseudo-second order. (c): IPD model.

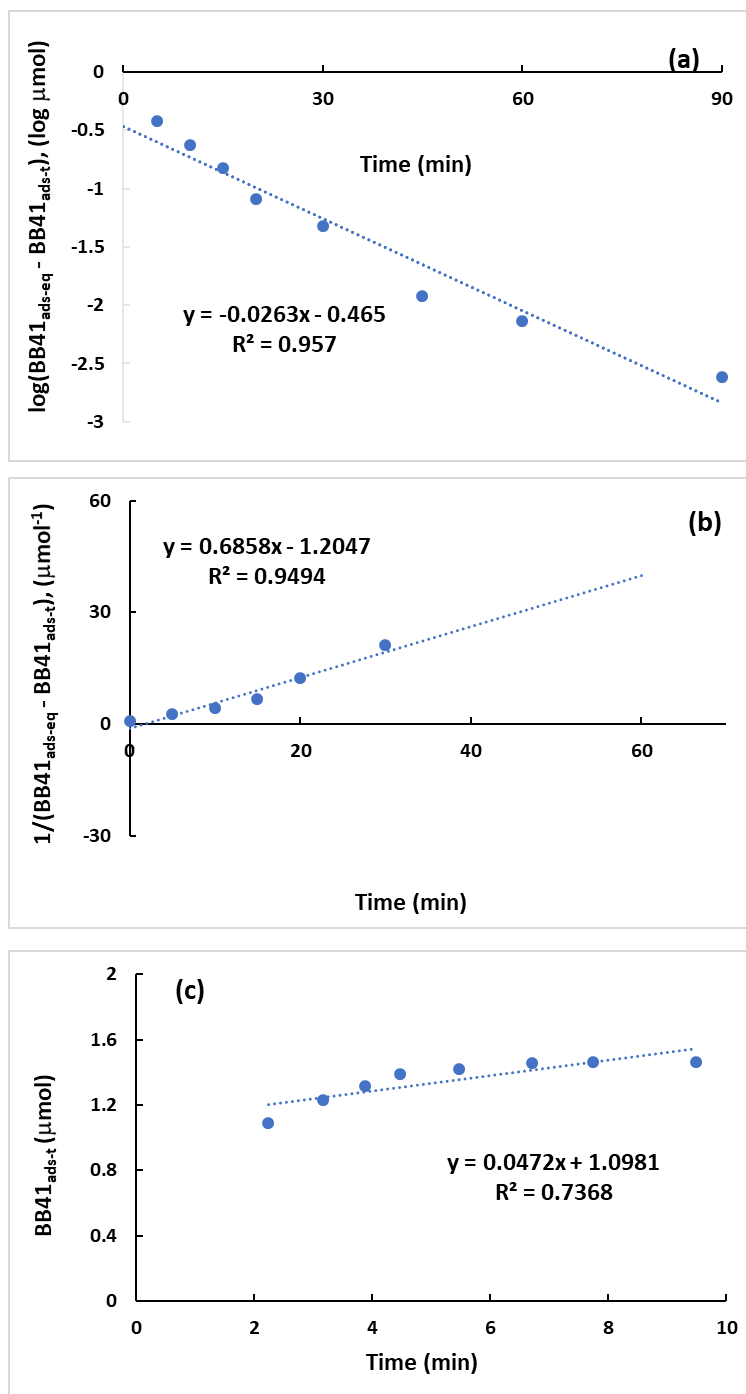

**Figure S5.** Kinetic treatment of the data of BB41 adsorption on C/ZnO/Zn. (a): Pseudo-first order. (b): Pseudo-second order. (c): IPD model.

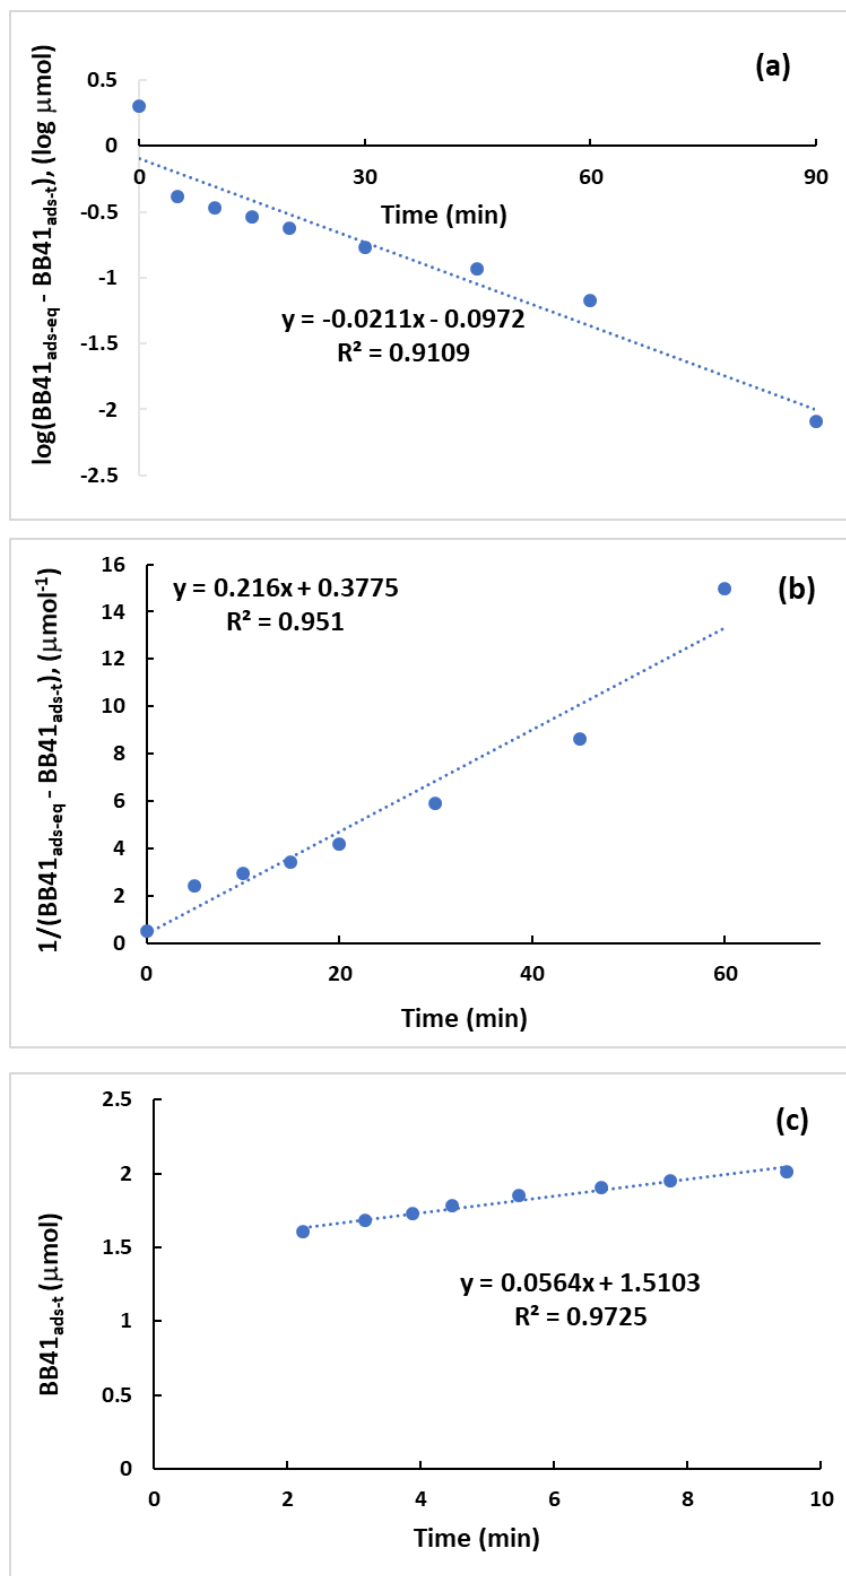

**Figure S6.** Kinetic treatment of the data of BB41 adsorption on ZnO. (a): Pseudo-first order. (b): Pseudo-second order. (c): IPD model.
